# Supplementary material
Source: publisher figshare collection journal article supplement (https://tandf.figshare.com/ndownloader/files/20746515)
Supplement: Supplementary file 1 [file 20746515]

Supplementary table. 1. Peer-reviewed Literature Search Strategy

| **Database** | **Keywords** | **Results** |
| --- | --- | --- |
| EBSCO  MEDLINE | (“Mobile Application*” or “Mobile App*” or "Portable Electronic App*" or "Portable Software App*") AND (Quality or Criteria or Evaluat* or Usability)  Limiters- Date of Publication: 20000101-20180731 | 2225 |
| EBSCO CINAHL | (“Mobile Application*” or “Mobile App*” or "Portable Electronic App*" or "Portable Software App*") AND (Quality or Criteria or Evaluat* or Usability)  Limiters- Date of Publication: 20000101-20180731 | 1776 |
| Ovid  PsycINFO | 1. (Mobile Application* or mobile app* or Portable Electronic App* or Portable Software App*).mp. [mp=title, abstract, heading word, table of contents, key concepts, original title, tests & measures]  2. (quality or criteria or evaluat* or usability).mp. [mp=title, abstract, heading word, table of contents, key concepts, original title, tests & measures]  3. 1 and 2  4.limit 3 to yr="2000 – Current (31/07/2018) | 381 |
| IEEE Explore | (Mobile application*) AND (quality OR usability) AND (Health) | 20 |
| INCLUDING REPEATED ARTICLES |  | 4402 |
| REPEATED  ARTICLES REMOVED |  | 725 |
| TOTAL |  | 3677 |

Supplementary table. 2.Grey Literature Search Strategy

| **Source Searched** | **Date searched** | **Search terms** | **Results** |
| --- | --- | --- | --- |
| Nielsen and Norman Group | 11/26/2018 | Mobile app rating scale | 28 (0 relevant) |
| Nielsen and Norman Group | 11/26/2018 | Mobile app quality scale | 18 (0 relevant) |
| Nielsen and Norman Group | 11/26/2018 | Mobile app evaluation scale | 13 (0 relevant) |
| Google | 11/26/2018 | Mobile app* rating scale | 79,300,000 (28 relevant) |
| Google | 11/26/2018 | Mobile app* quality scale | 187,000,000 (9 relevant) |
| Google | 11/26/2018 | Mobile app* evaluation scale | 29,000,000 (14 relevant) |
| The University of Alberta Grey Literature Collection | 11/27/2018 | Mobile app* rating scale | 14 (0 relevant) |
| The University of Alberta Grey Literature Collection | 11/27/2018 | Mobile app* quality scale | 72 (0 relevant) |
| The University of Alberta Grey Literature Collection | 11/27/2018 | Mobile app* evaluation scale | 17 (0 relevant) |
| Health On the Net (HON) | 11/27/2018 | Mobile app* rating scale | 28,700,000 (29 relevant) |

Supplementary table. 2. (continued) Grey Literature Search Strategy

| **Source Searched** | **Date searched** | **Search terms** | **Results** |
| --- | --- | --- | --- |
| Health On the Net (HON) | 11/27/2018 | Mobile app* quality scale | 35,900,000 (13 relevant) |
| Health On the Net (HON) | 11/27/2018 | Mobile app* evaluation scale | 10,200,000 (23 relevant) |
| ProQuest Dissertations & Theses Global | 11/27/2018 | Mobile app* rating scale | 79,137 (0 relevant) |
| ProQuest Dissertations & Theses Global | 11/27/2018 | Mobile app* quality scale | 331,557 (0 relevant) |
| ProQuest Dissertations & Theses Global | 11/27/2018 | Mobile app* evaluation scale | 308 (0 relevant) |
